# Supplementary material for: Conformational dynamics of FERM-mediated autoinhibition in Pyk2 tyrosine kinase
Source: bioRxiv or medRxiv preprint supplement (doi:10.1101/681932), 2019-06-24
Supplement: Supplementary file [file media-1.pdf]

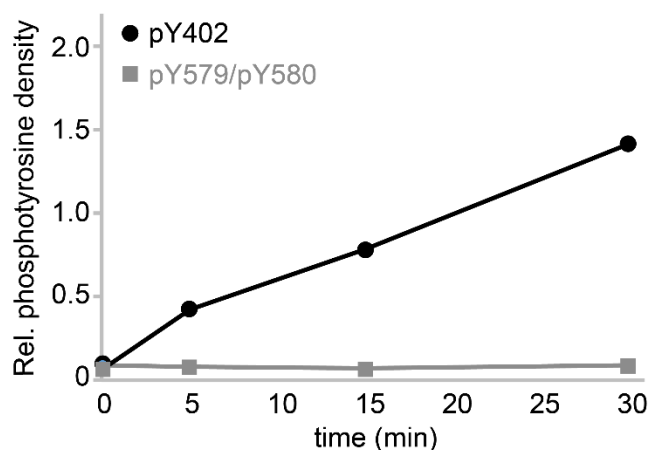

**Figure S1.** Pyk2 FERM-kinase site-specific autophosphorylation. Autophosphorylation was detected by Western blotting using site-specific anti-phosphotyrosine antibodies and quantified by densitometry.

| Data Set                             | FERM                                                                                             | kinase                                                                  | FERM-kinase                                                             |
|--------------------------------------|--------------------------------------------------------------------------------------------------|-------------------------------------------------------------------------|-------------------------------------------------------------------------|
| HDX reaction details                 | 150 mM KCl, 50 mM HEPES, 2 mM DTT, pH 7.40, 90% D <sub>2</sub> O, 24 °C                          | 150 mM KCl, 50 mM HEPES, 2 mM DTT, pH 7.40, 90% D <sub>2</sub> O, 24 °C | 150 mM KCl, 50 mM HEPES, 2 mM DTT, pH 7.40, 90% D <sub>2</sub> O, 24 °C |
| HDX time course                      | 0.167, 0.75, 3, 10, 30, 60, 180                                                                  | 0.167, 0.75, 3, 10, 30, 60, 180                                         | 0.167, 0.75, 3, 10, 30, 60, 180, O?N                                    |
| HDX control samples                  | Maximum-labeling estimated by 18 hour on-exchange time point (FERM-kinase), n=2                  |                                                                         |                                                                         |
| Back-exchange (mean / IQR)           | 36% / 12%                                                                                        |                                                                         |                                                                         |
| # of Peptides                        | 77                                                                                               | 52                                                                      | 129                                                                     |
| Sequence coverage                    | 92%                                                                                              | 81%                                                                     | 88%                                                                     |
| Average peptide length / Redundancy  | 10 (2.20)                                                                                        | 11 (2.14)                                                               | 10 (1.99)                                                               |
| Replicates (biological or technical) | 3 (technical)                                                                                    | 3 (technical)                                                           | 3 (technical)                                                           |
| Repeatability                        | 0.083 (average standard deviation)                                                               | 0.117 (average standard deviation)                                      | 0.096 (average standard deviation)                                      |
| Significance testing                 | two-tailed, unpaired t test, p<0.005 at time point(s) approximating the middle range of exchange |                                                                         |                                                                         |

**Table S1.** HDX-MS Data Summary Table.
